# Supplementary material for: A paper-based chemiluminescence detection device based on S,N-doped carbon quantum dots for the selective and highly sensitive recognition of bendiocarb
Source: Royal Society of Chemistry journal article supplement (doi:10.1039/d1ay00728a), 2021-01-01
Supplement: d1ay00728a1.pdf [file d1ay00728a1.pdf]

**Paper-based chemiluminescence detection device based on S, N-doped  
carbon quantum dots for the selective and highly sensitive recognition of  
bendiocarb**

Iman Al Yahyai<sup>a</sup>, Haider A.J. Al-Lawati<sup>a\*</sup>, Javad Hassanzadeh<sup>a</sup>

<sup>a</sup>Department of Chemistry, College of Science, Sultan Qaboos University, Box 36, Al-Khod 123, Oman

\*Corresponding author:

*Email: [haiderl@squ.edu.om](mailto:haiderl@squ.edu.om), Tel.: +968 24141481, Fax: + 968 24141469*

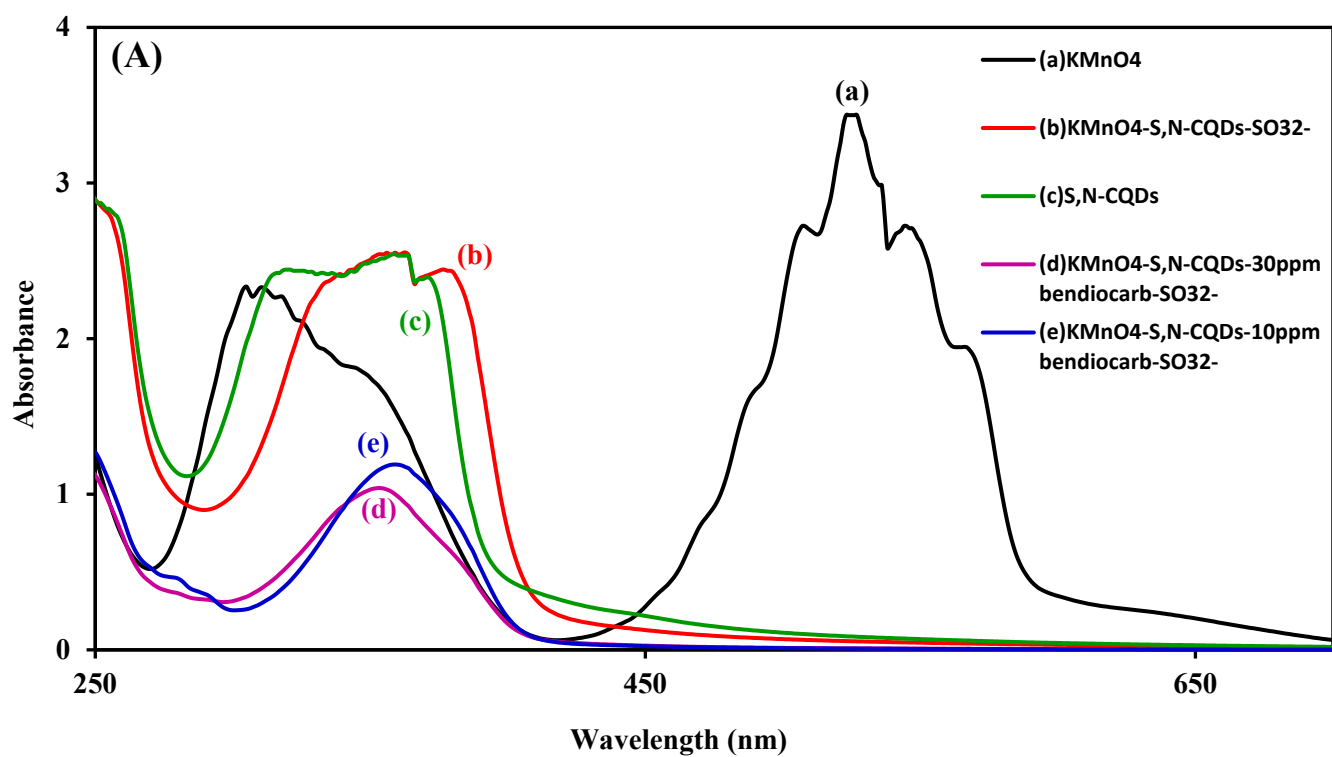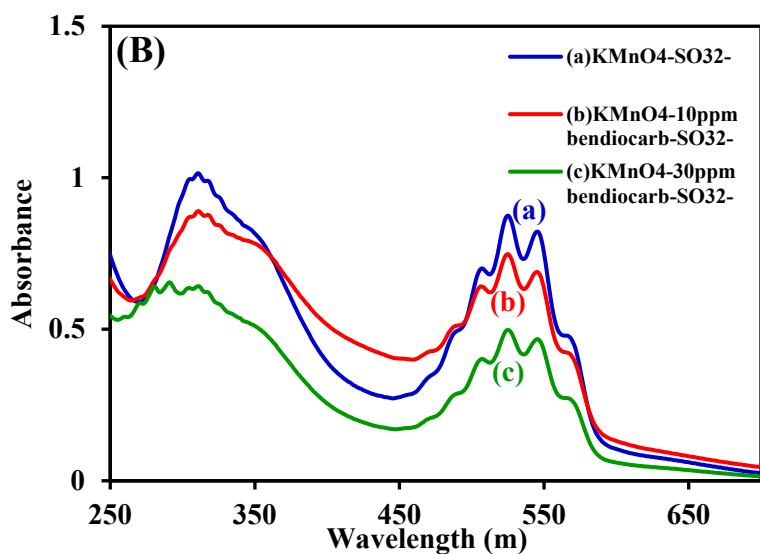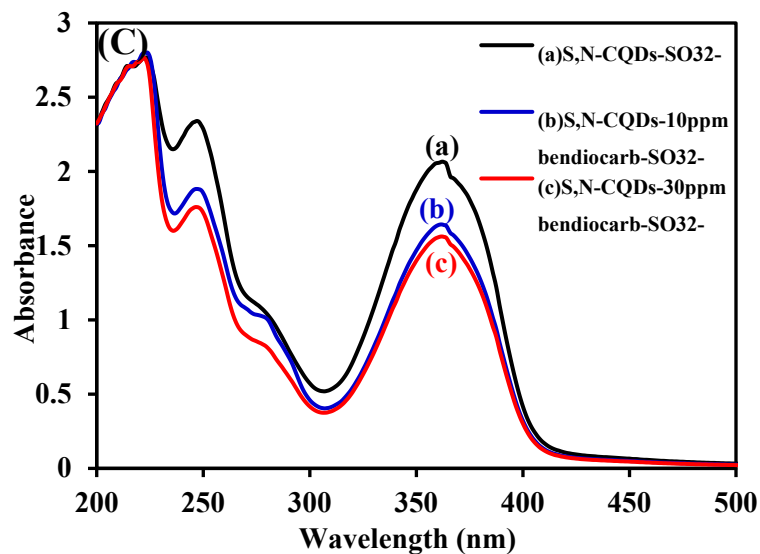

**Fig. S1.** (A) UV-vis absorbance spectra for different mixed solutions [ $\text{H}_2\text{SO}_4=0.1 \text{ M}$ ,  $\text{SO}_3^{2-}=0.01 \text{ M}$ , S, N-CQDs=0.03 mg mL<sup>-1</sup>, Bendiocarb=10  $\mu\text{g mL}^{-1}$ ]. (B&C) Bendiocarb effect on the UV-vis absorbance spectra of KMnO<sub>4</sub> and S, N-CQDs, respectively [ $\text{H}_2\text{SO}_4=0.1 \text{ M}$ ,  $\text{SO}_3^{2-}=0.01 \text{ M}$ , KMnO<sub>4</sub>=1 mM].

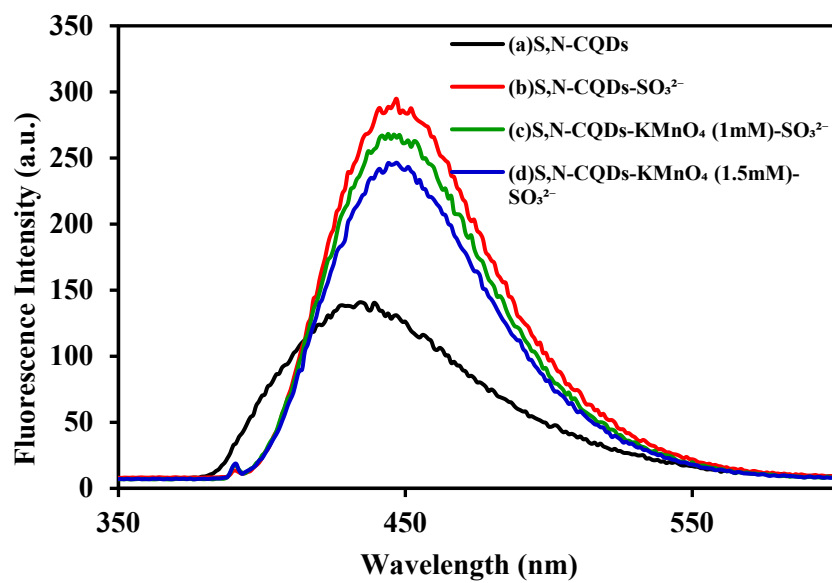

**Fig. S2.** Fluorescence spectra of  $0.03 \text{ mg mL}^{-1}$  S, N-CQDs in the presence of other reagents with an excitation wavelength of 390 nm [ $\text{H}_2\text{SO}_4=0.1 \text{ M}$ ,  $\text{SO}_3^{2-}=0.01 \text{ M}$ , m/v,  $\text{KMnO}_4=1 \text{ mM}$ ]

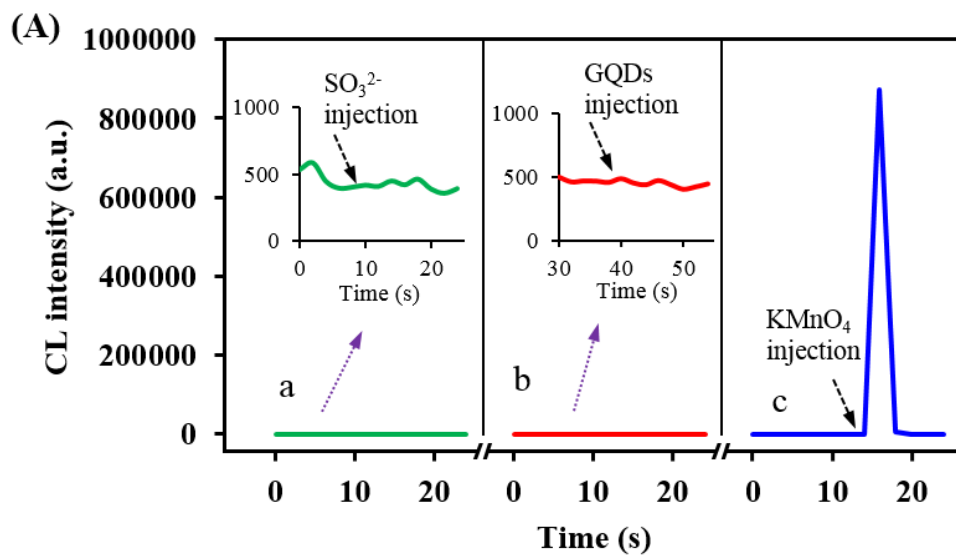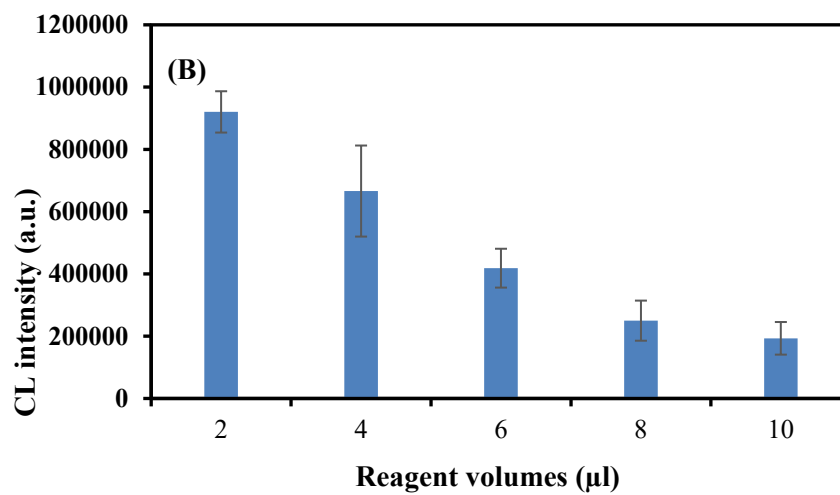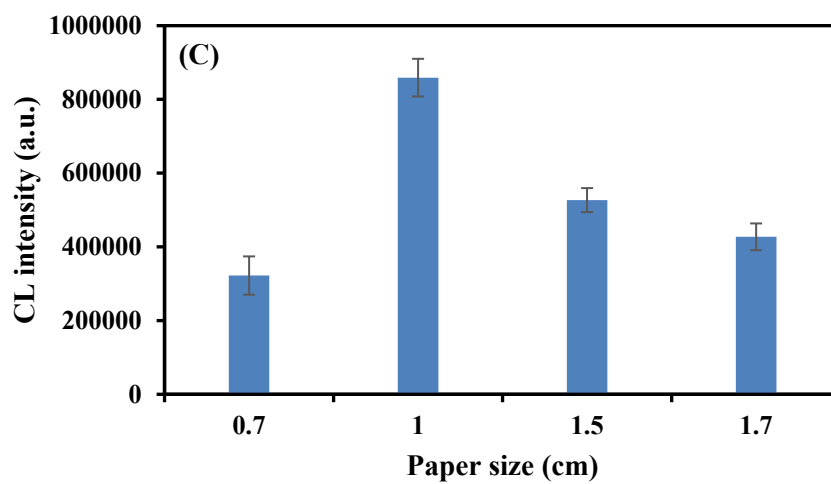

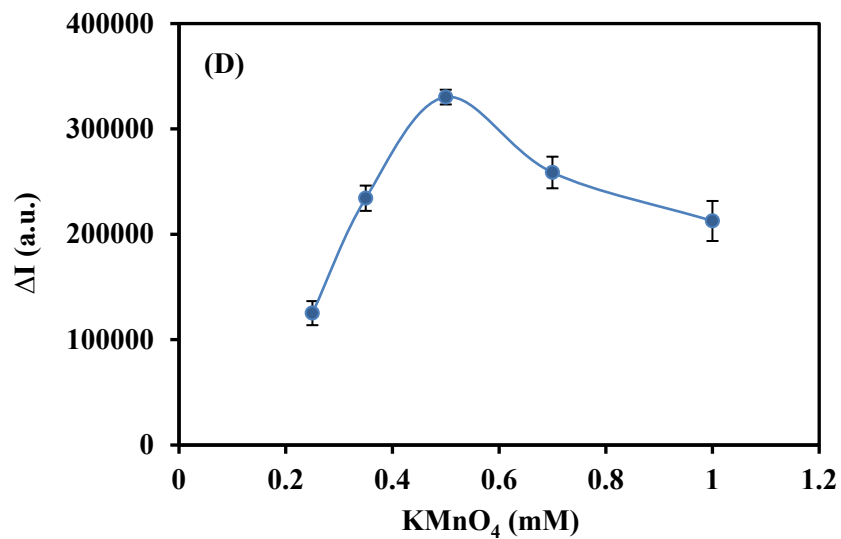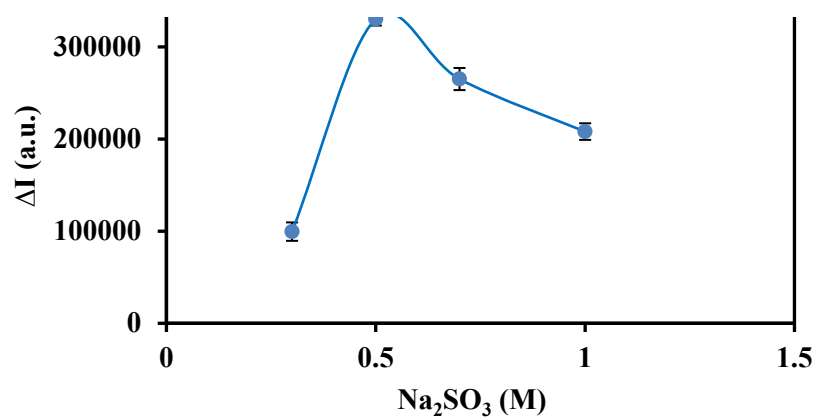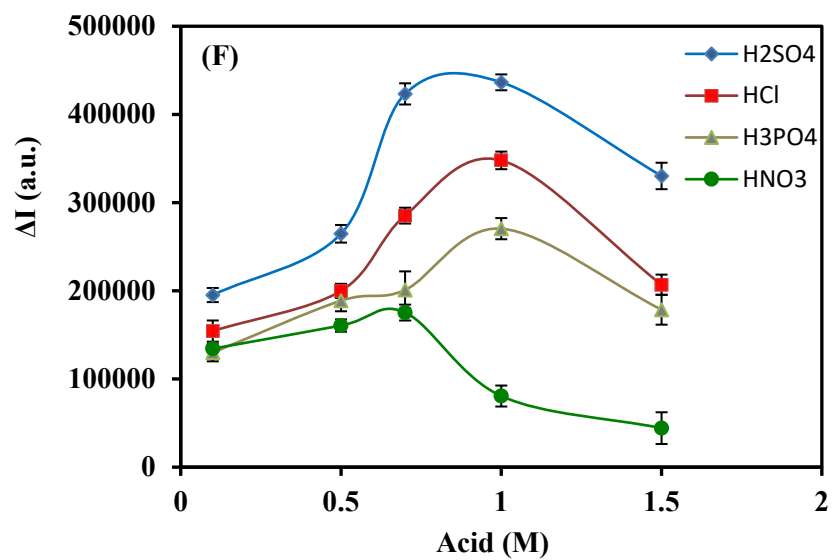

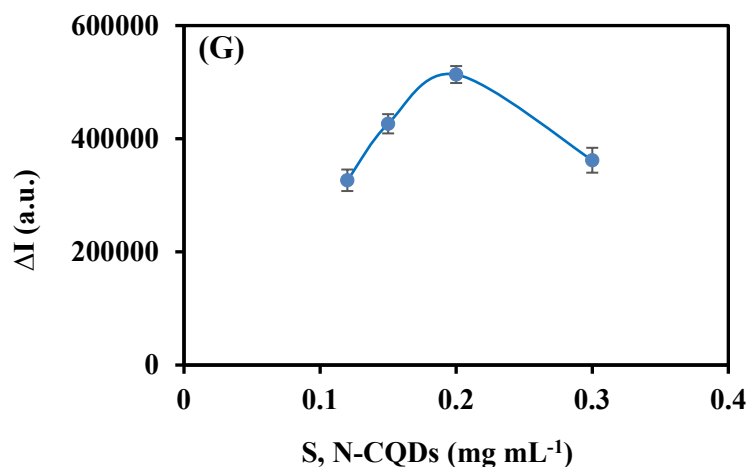

**Fig. S3.** Effects of different experimental factors on the CL response of the developed CL system: A) injection of different chemicals as the last reagent on the paper loaded by (a) H<sub>2</sub>SO<sub>4</sub>-KMnO<sub>4</sub>-GQDs, (b) H<sub>2</sub>SO<sub>4</sub>-SO<sub>3</sub><sup>2-</sup>-KMnO<sub>4</sub>, (c) H<sub>2</sub>SO<sub>4</sub>-SO<sub>3</sub><sup>2-</sup>-GQDs; B) volumes of reagents [1 mol L<sup>-1</sup> H<sub>2</sub>SO<sub>4</sub>, 0.5 mol L<sup>-1</sup> SO<sub>3</sub><sup>2-</sup>, 0.3 mg mL<sup>-1</sup> S, N-CQDs, 5 μg mL<sup>-1</sup> bendiocarb], C) paper size [conditions like B], D) KMnO<sub>4</sub> concentration [paper size 1 cm and other conditions like C], E) SO<sub>3</sub><sup>2-</sup> concentration [0.5 mmol L<sup>-1</sup> KMnO<sub>4</sub> and other conditions like D], F) acid type and concentration [0.5 mol L<sup>-1</sup> SO<sub>3</sub><sup>2-</sup> and other conditions like E], G) concentration of S, N-CQDs [1 mol L<sup>-1</sup> H<sub>2</sub>SO<sub>4</sub> and other conditions like F].

**Table S1.** Comparison of the proposed method for the determination of bendiocarb with some reported analytical methods.

| Method       | Metrix                                      | Linear range (μg mL <sup>-1</sup> ) | Limit of detection (μg mL <sup>-1</sup> ) | Reference |
|--------------|---------------------------------------------|-------------------------------------|-------------------------------------------|-----------|
| HPLC-PICL    | Soils                                       | 0.1-3.4                             | 0.09                                      | 1         |
| LC-ESI-MS/MS | Water samples                               | 0.015-0.09                          | 0.005                                     | 2         |
| RP-HPLC-UV   | -                                           | 5-60                                | 0.0650                                    | 3         |
| μPAD/ CL     | Fruit juices and environmental water sample | 0.1-10                              | 0.02                                      | This work |

(A) Abbreviations: (HPLC): high-performance liquid chromatography; (PICL): photo-induced chemiluminescence; (ESI): electrospray ionisation mass spectrometry; (MS/MS): Tandem mass spectrometry; (RP): Reversed phase

## References

- [1] R. V. Nair, R. T. Thomas, A. P. Mohamed and S. Pillai, *Microchem. J.*, 2020, **157**, 104971-104980.
- [2] D. Nartop, N. K. Yetim, E. H. Özkan and N. Sari, *J. Mol. Struct.*, 2020, **1200**, 127039-127046.
- [3] R. Ouertani, L. L. El Atrache and N. B. Hamida, *Chemom. Intell. Lab. Syst.*, 2016, **154**, 38-44.

**Table S2** tolerable concentrations of some possible interfering compounds on the response of the developed paper-based CL device for bendiocarb ( $5 \mu\text{g mL}^{-1}$ )

| Compounds                                                                                                  | Tolerable concentration ( $5 \mu\text{g mL}^{-1}$ )<br>with an error of less than 5% |
|------------------------------------------------------------------------------------------------------------|--------------------------------------------------------------------------------------|
| Sugars (fructose, lactose, glucose and sucrose)                                                            | 100                                                                                  |
| Vitamin C                                                                                                  | 50                                                                                   |
| Amino acids (histidine, l-cysteine, l-leucine)                                                             | 50                                                                                   |
| Phenols (catechin, caffeic acid)                                                                           | 50                                                                                   |
| Ions ( $\text{MgCl}_2$ , $\text{NaHCO}_3$ )                                                                | 500                                                                                  |
| Ions ( $\text{KCl}$ , $\text{Na}_2\text{SO}_4$ , $\text{Ca}(\text{NO}_3)_2$ , $\text{Fe}(\text{NO}_3)_3$ ) | 100                                                                                  |
| Pesticides (deltamethrin, carbaryl, carbofuran, propoxur)                                                  | 10                                                                                   |
